# Supplementary material for: Comparative Metagenomic Analysis of Bacteriophages and Prophages in Gnotobiotic Mouse Models
Source: MDPI journal article supplement (doi:10.3390/microorganisms12020255), 2024-01-25
Supplement: s1 [file s1]

# **Comparative Metagenomic Analysis of Bacteriophages and Prophages in Gnotobiotic Mouse Models**

**Oluwaseun A. Ishola,<sup>1</sup> Susanne Kublik,<sup>1</sup> Abilash Chakravarthy Durai Raj,<sup>1†</sup> Caspar Ohnmacht,<sup>2</sup> Stefanie Schulz<sup>1\*</sup>, Bärbel U. Foessel<sup>1††</sup>, Michael Schloter,<sup>1,3,4</sup>**

<sup>1</sup> Research Unit for Comparative Microbiome Analysis, Helmholtz Center Munich, German Research Center for Environmental Health, Neuherberg, Germany.

<sup>2</sup> Mucosal Immunology Group, Center of Allergy and Environment (ZAUM), Technical University and Helmholtz Center Munich, Munich, Germany.

<sup>3</sup> Technical University of Munich, Chair for Environmental Microbiology, Freising, Germany.

<sup>4</sup> Technical University of Munich, Central Institute for Nutrition and Health, Freising, Germany.

<sup>†</sup> Present address: Max von Pettenkofer Institute of Hygiene and Medical Microbiology, Ludwig-Maximilians-University of Munich, Munich, Germany.

<sup>††</sup> Present address: Institute of Epidemiology, Research Unit Molecular Epidemiology, Helmholtz Munich, Germany.

**Table S1:** Gnotobiotic murine models Oligo-MM12 and ASF microflora inoculum

| <b>Oligo-MM12</b>                                         | <b>ASF</b>                                   |
|-----------------------------------------------------------|----------------------------------------------|
| <i>Clostridium innocuum</i>                               | <i>Clostridium spp ASF</i>                   |
| <i>Bacteroides caecimuris</i>                             | <i>Lactobacillus murinus</i><br><i>ASF</i>   |
| <i>Lactobacillus reuteri</i>                              | <i>Parabacteriodes</i><br><i>goldsteinii</i> |
| <i>Enterococcus faecalis</i>                              |                                              |
| <i>Muribaculum intestinale</i>                            |                                              |
| <i>Flavonifractor plautii</i>                             |                                              |
| <i>Clostridium clostridioforme</i>                        |                                              |
| <i>Akkermansia muciniphila</i>                            |                                              |
| <i>Turicimonas muris</i>                                  |                                              |
| <i>Blautia coccoides</i>                                  |                                              |
| <i>Acutalibacter muris</i>                                |                                              |
| <i>Bifidobacterium animalis</i><br><i>subsp. animalis</i> |                                              |

**Table S2:** Read statistics of metagenomic sequencing samples included in this study.

| <b>Sample Sequencing name</b>           | <b>Sample name</b>        | <b>No. of raw reads</b> | <b>No. of reads after adapter removal</b> | <b>No. of reads after trimming</b> | <b>No. of host-mouse reads</b> | <b>No. of non-mouse reads</b> | <b>% of murine reads</b> | <b>No. of 16S rRNA removed</b> | <b>No. of non-rRNA reads</b> |
|-----------------------------------------|---------------------------|-------------------------|-------------------------------------------|------------------------------------|--------------------------------|-------------------------------|--------------------------|--------------------------------|------------------------------|
| seuntube10_S10_R1_001, pair, clean, fq  | SPF ileum content R1      | 32469279.00             | 28187328.00                               | 26789345.00                        | 19849360.00                    | 6701229.00                    | 74.09                    | 57003.50                       | 6644225.50                   |
| seuntube10_S10_R2_001, pair, clean, fq  | SPF ileum content R2      | 32469279.00             | 28187328.00                               | 26789345.00                        | 19849360.00                    | 6701229.00                    | 74.09                    | 57003.50                       | 6644225.50                   |
| seuntube11_S11_R1_001, pair1, clean, fq | ASF ileum content R1      | 22518571.00             | 19158564.00                               | 14528890.00                        | 13775112.00                    | 597319.00                     | 94.81                    | 20252.00                       | 577067.00                    |
| seuntube11_S11_R2_001, pair1, clean, fq | ASF ileum content R2      | 22518571.00             | 19158564.00                               | 14528890.00                        | 13775112.00                    | 597319.00                     | 94.81                    | 20252.00                       | 577067.00                    |
| seuntube12_S12_R1_001, pair1, clean, fq | Oligo-MM ileum content R1 | 26300108.00             | 24650174.00                               | 24650174.00                        | 21868625.00                    | 2293007.00                    | 88.72                    | 112982.50                      | 2180024.50                   |
| seuntube12_S12_R2_001, pair1, clean, fq | Oligo-MM ileum            | 26300108.00             | 24650174.00                               | 24650174.00                        | 21868625.00                    | 2293007.00                    | 88.72                    | 112982.50                      | 2180024.50                   |

|                                                     |                                     |             |             |             |             |             |       |           |             |
|-----------------------------------------------------|-------------------------------------|-------------|-------------|-------------|-------------|-------------|-------|-----------|-------------|
|                                                     | content<br>R2                       |             |             |             |             |             |       |           |             |
| <b>seuntube1_S1_<br/>R1_001,pair1_cl<br/>ean,fq</b> | SPF colon<br>content<br>R1          | 33212147.00 | 29625432.00 | 22775691.00 | 1050952.00  | 21701930.00 | 4.61  | 137837.00 | 21564093.00 |
| <b>seuntube1_S1_<br/>R2_001,pair1_cl<br/>ean,fq</b> | SPF colon<br>content<br>R2          | 33212147.00 | 29625432.00 | 22775691.00 | 1050952.00  | 21701930.00 | 4.61  | 137837.00 | 21564093.00 |
| <b>seuntube2_S2_<br/>R1_001,pair1_cl<br/>ean,fq</b> | ASF<br>colon<br>content<br>R1       | 24930096.00 | 23388936.00 | 22386511.00 | 3425486.00  | 18898931.00 | 15.30 | 98294.50  | 18800636.50 |
| <b>seuntube2_S2_<br/>R2_001,pair1_cl<br/>ean,fq</b> | ASF<br>colon<br>content<br>R2       | 24930096.00 | 23388936.00 | 22386511.00 | 3425486.00  | 18898931.00 | 15.30 | 98294.50  | 18800636.50 |
| <b>seuntube3_S3_<br/>R1_001,pair1_cl<br/>ean,fq</b> | Oligo-<br>MM colon<br>content<br>R1 | 23217211.00 | 22227299.00 | 20412986.00 | 1214256.00  | 19142525.00 | 5.95  | 106352.00 | 19036173.00 |
| <b>seuntube3_S3_<br/>R2_001,pair1_cl<br/>ean,fq</b> | Oligo-<br>MM colon<br>content<br>R2 | 23217211.00 | 22227299.00 | 20412986.00 | 1214256.00  | 19142525.00 | 5.95  | 106352.00 | 19036173.00 |
| <b>seuntube4_S4_<br/>R1_001,pair1_cl<br/>ean,fq</b> | SPF ileum<br>tissue R1              | 20201473.00 | 16104339.00 | 15024334.00 | 13479765.00 | 2346752.00  | 89.72 | 114821.50 | 2231930.50  |

|                                           |                          |             |             |             |             |            |       |           |            |
|-------------------------------------------|--------------------------|-------------|-------------|-------------|-------------|------------|-------|-----------|------------|
| <b>seuntube4_S4_R2_001,pair1_clean,fq</b> | SPF ileum tissue R2      | 20201473.00 | 16104339.00 | 15024334.00 | 13479765.00 | 2346752.00 | 89.72 | 114821.50 | 2231930.50 |
| <b>seuntube5_S5_R1_001,pair1_clean,fq</b> | ASF ileum tissue R1      | 27893268.00 | 21613834.00 | 20208117.00 | 18010960.00 | 1996069.00 | 89.13 | 33724.50  | 1962344.50 |
| <b>seuntube5_S5_R2_001,pair1_clean,fq</b> | ASF ileum tissue R2      | 27893268.00 | 21613834.00 | 20208117.00 | 18010960.00 | 1996069.00 | 89.13 | 33724.50  | 1962344.50 |
| <b>seuntube6_S6_R1_001,pair1_clean,fq</b> | Oligo-MM ileum tissue R1 | 31028385.00 | 26791872.00 | 21849264.00 | 17294225.00 | 4134271.00 | 79.15 | 214795.50 | 3919475.50 |
| <b>seuntube6_S6_R2_001,pair1_clean,fq</b> | Oligo-MM ileum tissue R2 | 31028385.00 | 26791872.00 | 21849264.00 | 17294225.00 | 4134271.00 | 79.15 | 214795.50 | 3919475.50 |
| <b>seuntube7_S7_R1_001,pair1_clean</b>    | SPF colon tissue R1      | 21879263.00 | 20682534.00 | 19758590.00 | 16036821.00 | 2368853.00 | 81.16 | 52517.50  | 2316335.50 |
| <b>seuntube7_S7_R2_001,pair1_clean</b>    | SPF colon tissue R2      | 21879263.00 | 20682534.00 | 19758590.00 | 16036821.00 | 2368853.00 | 81.16 | 52517.50  | 2316335.50 |
| <b>seuntube8_S8_R1_001,pair1_clean</b>    | ASF colon tissue R1      | 30445992.00 | 27888628.00 | 27888628.00 | 22815114.00 | 3678338.00 | 81.81 | 183416.50 | 3494921.50 |

|                                        |                          |                     |                     |                     |                     |                    |       |                   |                    |
|----------------------------------------|--------------------------|---------------------|---------------------|---------------------|---------------------|--------------------|-------|-------------------|--------------------|
| <b>seuntube8_S8_R2_001,pair1_clean</b> | ASF colon tissue R2      | 30445992.00         | 27888628.00         | 27888628.00         | 22815114.00         | 3678338.00         | 81.81 | 183416.50         | 3494921.50         |
| <b>seuntube9_S9_R1_001,pair1_clean</b> | Oligo-MM colon tissue R1 | 10159586.00         | 8007039.00          | 6097944.00          | 5530529.00          | 497985.00          | 90.69 | 12363.50          | 485621.50          |
| <b>seuntube9_S9_R2_001,pair1_clean</b> | Oligo-MM colon tissue R2 | 10159586.00         | 8007039.00          | 6097944.00          | 5530529.00          | 497985.00          | 90.69 | 12363.50          | 485621.50          |
| <b>Total</b>                           |                          | <b>304255379.00</b> | <b>268325979.00</b> | <b>242370474.00</b> | <b>154351205.00</b> | <b>84357209.00</b> |       | <b>1144360.50</b> | <b>83212848.50</b> |

**Table S3:** Contig assembly statistics of non-host non-rRNA reads.

| <b>Sample names</b>                        | <b>Total number of contigs</b> | <b>Total contigs length (bp)</b> | <b>Minimum contigs length</b> | <b>Maximum contigs length</b> | <b>Average length (bp)</b> | <b>N50</b> |
|--------------------------------------------|--------------------------------|----------------------------------|-------------------------------|-------------------------------|----------------------------|------------|
| SPF merged colon content and tissue        | 304899                         | 279317015                        | 200                           | 420970                        | 916                        | 1250       |
| Oligo-MM12 merged colon content and tissue | 12326                          | 27776895                         | 200                           | 290252                        | 2254                       | 32819      |
| ASF merged colon content and tissue        | 13979                          | 15346287                         | 200                           | 355576                        | 1098                       | 34658      |
| SPF merged ileum content and tissue        | 51777                          | 59060320                         | 200                           | 147546                        | 1141                       | 2336       |
| Oligo-MM12 merged ileum content and tissue | 25536                          | 19102394                         | 200                           | 237544                        | 748                        | 1442       |
| ASF merged ileum content and tissue        | 5457                           | 4140752                          | 200                           | 104512                        | 759                        | 5099       |

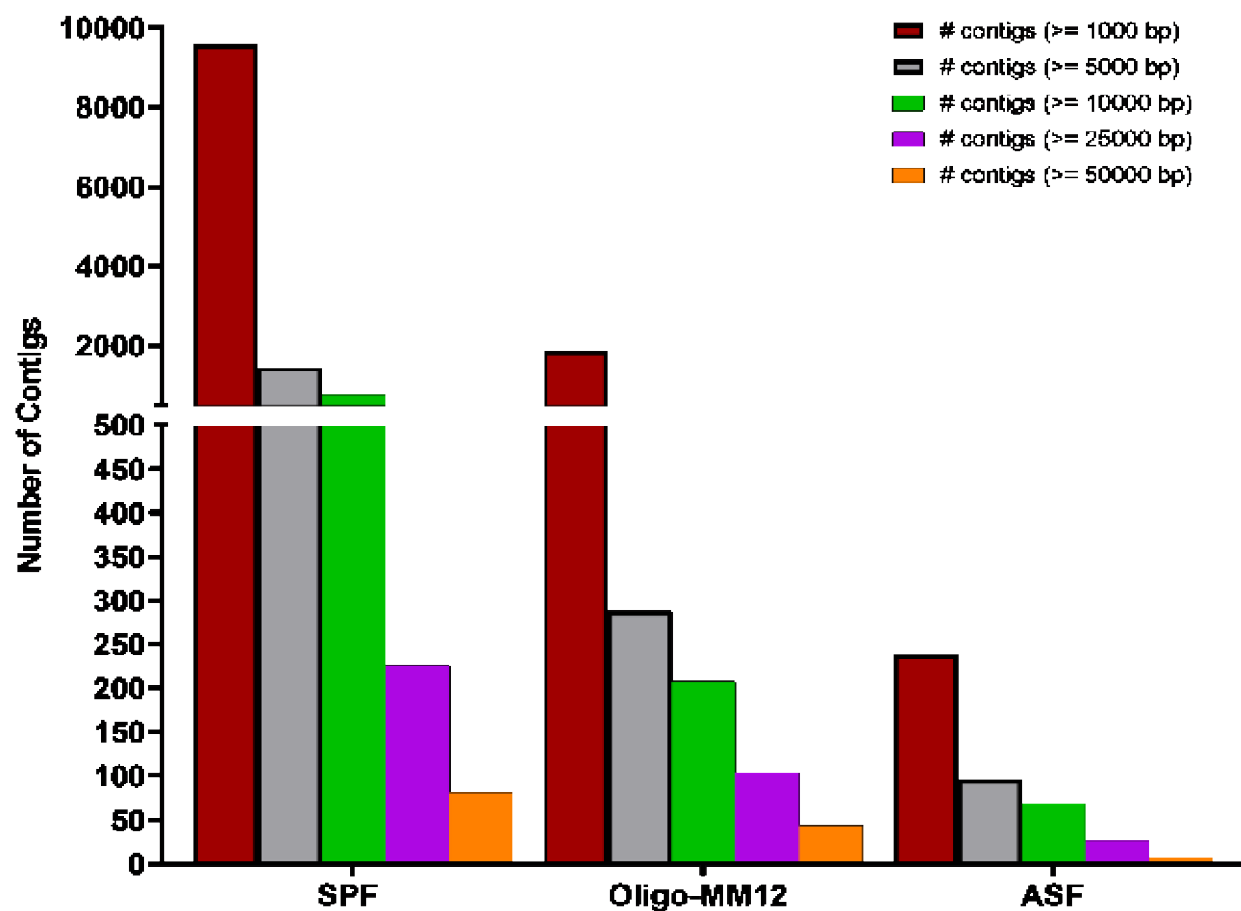

**Figure S1:** Assembly of murine model reads: Bar chart of paired-end contig assembly distribution in SPF, Oligo-MM12 and ASF.



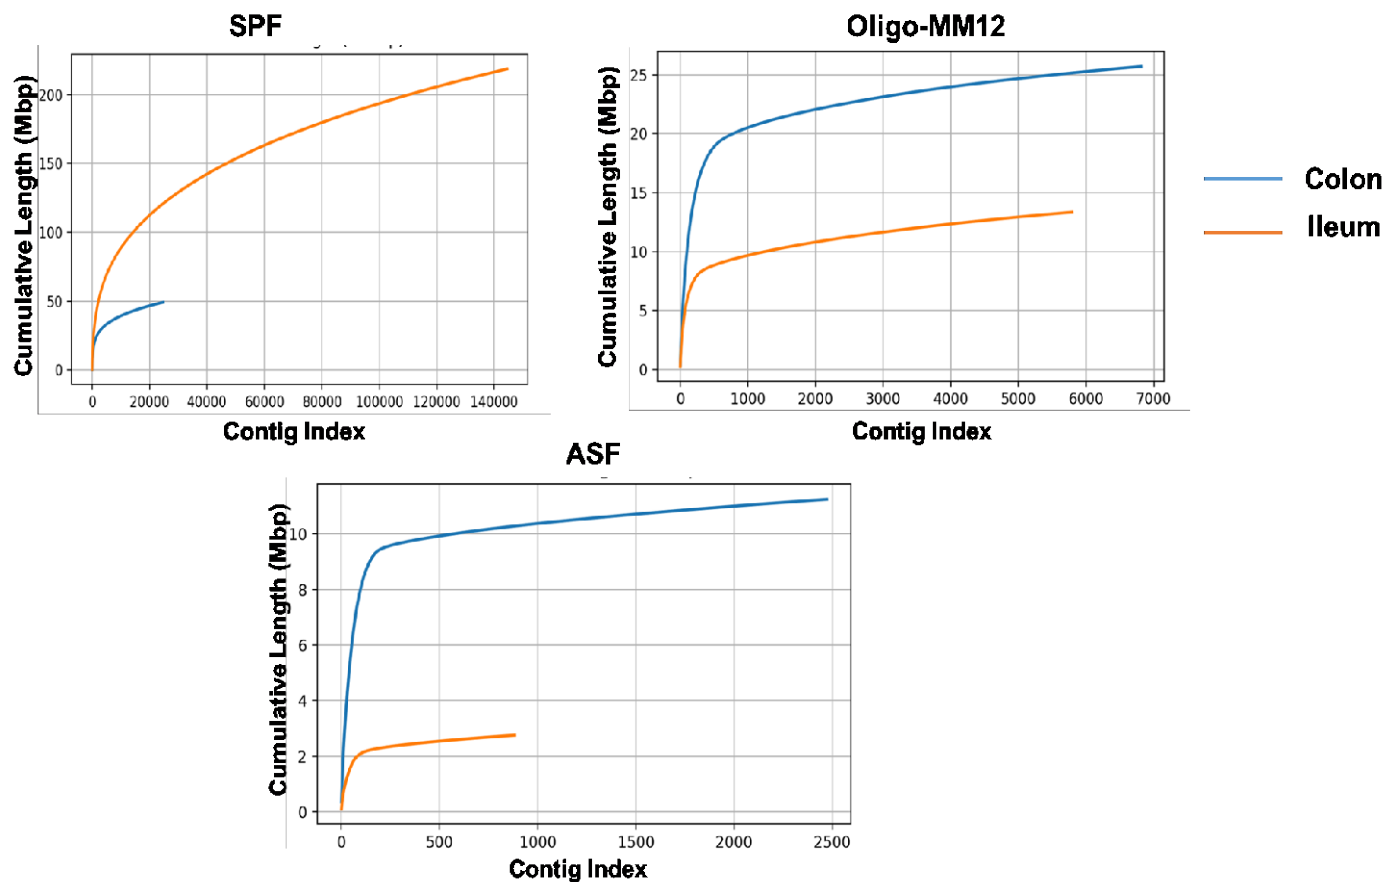

**Figure S2:** Assembly of murine model reads; frequency of assembled contigs distribution among the murine models. The cumulative length shows the size of an assembly and the number of contigs in it, and the contig index represents the longest to shortest assembly. Orange colour line represents the ileum while blue the colon.

**Table S4:** Bacterial community structure in ileum and colon samples from the gnotobiotic murine models inoculated with Oligo-MM12 and ASF. Values displayed are relative abundance in % at the species level.

| Oligo-MM12                         |            |            | ASF                                             |            |            |
|------------------------------------|------------|------------|-------------------------------------------------|------------|------------|
| Bacterial species                  | Ileum      | Colon      | Bacterial species                               | Ileum      | Colon      |
| <i>Clostridium innocuum</i>        | 0.13       | 0.07       | <i>Clostridium spp</i><br><i>ASF</i>            | 0          | 6.89       |
| <i>Bacteroides caecimuris</i>      | 76.19      | 7.49       | <i>Lactobacillus</i><br><i>murinus ASF</i>      | 99.02      | 0.62       |
| <i>Lactobacillus reuteri</i>       | 0.01       | 2.90       | <i>Parabacterioidetes</i><br><i>goldsteinii</i> | 0.98       | 92.49      |
| <i>Enterococcus faecalis</i>       | 0.01       | 0.00       |                                                 |            |            |
| <i>Muribaculum intestinale</i>     | 10.62      | 30.66      |                                                 |            |            |
| <i>Flavonifractor plautii</i>      | 0.49       | 0.32       |                                                 |            |            |
| <i>Clostridium clostridioforme</i> | 6.36       | 0.97       |                                                 |            |            |
| <i>Akkermansia muciniphila</i>     | 3.27       | 39.67      |                                                 |            |            |
| <i>Turicimonas muris</i>           | 2.76       | 17.62      |                                                 |            |            |
| <i>Blautia coccoides</i>           | 0.16       | 0.30       |                                                 |            |            |
| <b>Total</b>                       | <b>100</b> | <b>100</b> |                                                 | <b>100</b> | <b>100</b> |

**Table S5:** Bacterial community structure in ileum and colon samples from SPF mice. Values displayed are relative abundance in % at the species level.

| <b>SPF bacterial species</b>          | <b>Ileum</b> | <b>Colon</b> |
|---------------------------------------|--------------|--------------|
| <i>Acutalibacter muris</i>            | 0            | 0.00455      |
| <i>Acutalibacter sp1XD833</i>         | 0            | 0.0619       |
| <i>Akkermansia muciniphila</i>        | 0.15498      | 0.12654      |
| <i>Alistipes sp</i>                   | 0.02773      | 3.45665      |
| <i>Anaerotruncus sp1XD4293</i>        | 0            | 0.50146      |
| <i>Atopobiaceae bacteriumFL090493</i> | 0.0247       | 0.00568      |
| <i>Bacteria unclassifiedSGB41508</i>  | 0            | 0.06453      |
| <i>Bacteria unclassifiedSGB41729</i>  | 0            | 0.0288       |
| <i>Bacteria unclassifiedSGB43539</i>  | 0            | 0.00414      |
| <i>Bacteria unclassifiedSGB43541</i>  | 0            | 0.00386      |
| <i>Bacterium 01xD882</i>              | 0            | 0.0103       |
| <i>Bacterium 1XD2113</i>              | 0            | 0.03885      |
| <i>Bacterium 1XD421</i>               | 0            | 0.52163      |
| <i>Bacterium 1XD4276</i>              | 0            | 0.02923      |
| <i>Bacterium 1xD4287</i>              | 0            | 0.22607      |
| <i>Bacterium 1xD848</i>               | 0            | 0.02486      |
| <i>Bacterium 1xD86</i>                | 0            | 0.14364      |
| <i>Bacterium D1629</i>                | 0            | 0.05154      |
| <i>Bacterium D1676</i>                | 0            | 0.02471      |
| <i>Bacteroidaceae bacterium</i>       | 0.04505      | 1.72578      |
| <i>Bacteroidales bacterium</i>        | 14.99742     | 4.74278      |
| <i>Bacteroides acidifaciens</i>       | 0            | 0.14199      |
| <i>Bacteroides caecimuris</i>         | 0            | 0.10552      |
| <i>Bacteroides spL104</i>             | 0            | 0.43813      |
| <i>Barnesiella spCU968</i>            | 3.28986      | 0.80602      |
| <i>BlautiaSGB43555</i>                | 0            | 0.14114      |
| <i>Brevibacterium SGB41697</i>        | 0            | 0.02819      |
| <i>Clostridiaceae bacterium</i>       | 0            | 0.03219      |
| <i>Clostridiales bacterium</i>        | 0            | 0.03974      |
| <i>Clostridium SGB40327</i>           | 0.68585      | 0.25611      |
| <i>Desulfovibrio SGB40192</i>         | 0.31103      | 10.83932     |
| <i>Desulfovibrio SGB41239</i>         | 0            | 0.00324      |
| <i>Dorea sp52</i>                     | 0            | 0.01006      |
| <i>Duncaniella dubosii</i>            | 7.6005       | 2.16354      |
| <i>Duncaniella freteri</i>            | 1.99252      | 0.67867      |
| <i>Duncaniella muris</i>              | 14.7991      | 4.48316      |

|                                |          |         |
|--------------------------------|----------|---------|
| <i>Emergencia sp1XD2110</i>    | 0        | 0.00969 |
| <i>Eubacterium SGB102306 2</i> | 0        | 0.0142  |
| GGB14001 SGB21428              | 1.0683   | 0.35265 |
| GGB18827 SGB41440              | 0        | 0.0724  |
| GGB20145 SGB41586              | 0        | 0.00422 |
| GGB20146 SGB29427              | 0        | 0.0496  |
| GGB20149 SGB29430              | 0        | 0.06222 |
| GGB23844 SGB35575              | 0        | 1.10852 |
| GGB24102 SGB40205              | 0        | 0.8953  |
| GGB24132 SGB35935              | 1.23027  | 0.43477 |
| GGB24149 SGB35953              | 2.87501  | 0.43156 |
| GGB25052 SGB36974              | 0        | 0.67076 |
| GGB25107 SGB41514              | 0        | 0.21614 |
| GGB261 SGB59900                | 0        | 0.02212 |
| GGB27782 SGB40196              | 0        | 0.5314  |
| GGB27861 SGB40295              | 1.5944   | 0.19307 |
| GGB27866 SGB40300              | 0.89879  | 0.43255 |
| GGB27872 SGB40306              | 0.51612  | 0.18014 |
| GGB27873 SGB40307              | 1.46125  | 0.51149 |
| GGB27885 SGB40319              | 1.08366  | 0.38084 |
| GGB27890 SGB40324              | 1.13688  | 0.45307 |
| GGB27892 SGB40326              | 12.21319 | 4.11916 |
| GGB27929 SGB40368              | 2.60108  | 0.878   |
| GGB27929 SGB41624              | 0        | 0.00876 |
| GGB28248 SGB40791              | 0.0543   | 2.22569 |
| GGB28265 SGB40817              | 0        | 1.75288 |
| GGB28308 SGB40878              | 0.04765  | 2.00762 |
| GGB28317 SGB40889              | 0        | 0.17172 |
| GGB28330 SGB40904              | 0        | 0.01785 |
| GGB28357 SGB40935              | 0        | 0.15814 |
| GGB28381 SGB40961              | 0        | 0.30219 |
| GGB28382 SGB40962              | 0        | 0.42572 |
| GGB28383 SGB40963              | 0.03231  | 0.18838 |
| GGB28384 SGB40964              | 0        | 0.1056  |
| GGB28386 SGB40966              | 0        | 0.13723 |
| GGB28392 SGB40972              | 0        | 0.13631 |
| GGB28393 SGB40973              | 0.03231  | 2.11221 |
| GGB28394 SGB40975              | 0        | 0.01379 |
| GGB28401 SGB40983              | 0        | 0.60913 |
| GGB28403 SGB40190              | 0        | 0.14234 |
| GGB28404 SGB40986              | 0        | 0.04308 |

|                   |   |         |
|-------------------|---|---------|
| GGB28409 SGB40991 | 0 | 0.01287 |
| GGB28418 SGB41000 | 0 | 0.01072 |
| GGB28418 SGB41001 | 0 | 0.68208 |
| GGB28430 SGB41013 | 0 | 0.00254 |
| GGB28431 SGB41014 | 0 | 0.00181 |
| GGB28433 SGB41016 | 0 | 0.02539 |
| GGB28437 SGB41020 | 0 | 0.02566 |
| GGB28439 SGB41022 | 0 | 0.1858  |
| GGB28456 SGB41039 | 0 | 0.24674 |
| GGB28632 SGB41253 | 0 | 0.01488 |
| GGB28761 SGB41409 | 0 | 0.0166  |
| GGB28765 SGB41415 | 0 | 0.10759 |
| GGB28769 SGB41421 | 0 | 0.00923 |
| GGB28776 SGB41429 | 0 | 0.06031 |
| GGB28782 SGB41435 | 0 | 0.02816 |
| GGB28783 SGB41436 | 0 | 0.00492 |
| GGB28793 SGB41446 | 0 | 0.02288 |
| GGB28817 SGB41472 | 0 | 0.0245  |
| GGB28822 SGB41478 | 0 | 0.00609 |
| GGB28828 SGB41484 | 0 | 0.42117 |
| GGB28829 SGB41485 | 0 | 0.07246 |
| GGB28835 SGB41494 | 0 | 0.33478 |
| GGB28836 SGB41495 | 0 | 0.00047 |
| GGB28839 SGB41503 | 0 | 0.00146 |
| GGB28841 SGB41505 | 0 | 0.01409 |
| GGB28842 SGB41507 | 0 | 0.08936 |
| GGB28845 SGB41512 | 0 | 0.02214 |
| GGB28849 SGB41516 | 0 | 0.10228 |
| GGB28853 SGB41519 | 0 | 0.02142 |
| GGB28854 SGB41523 | 0 | 0.02539 |
| GGB28855 SGB41524 | 0 | 0.03099 |
| GGB28861 SGB41531 | 0 | 0.30702 |
| GGB28865 SGB41537 | 0 | 0.0118  |
| GGB28865 SGB43001 | 0 | 0.00704 |
| GGB28868 SGB41542 | 0 | 0.17239 |
| GGB28879 SGB43526 | 0 | 0.02334 |
| GGB28880 SGB41560 | 0 | 0.06226 |
| GGB28881 SGB41561 | 0 | 0.00972 |
| GGB28883 SGB41564 | 0 | 0.03677 |
| GGB28885 SGB41566 | 0 | 0.53526 |
| GGB28888 SGB41569 | 0 | 0.0265  |

|                   |         |         |
|-------------------|---------|---------|
| GGB28895 SGB41576 | 0       | 0.05296 |
| GGB28901 SGB41592 | 0       | 0.06842 |
| GGB28903 SGB41594 | 0       | 0.00927 |
| GGB28904 SGB41597 | 0       | 0.0624  |
| GGB28905 SGB41598 | 0       | 0.0457  |
| GGB28907 SGB41600 | 0       | 0.11962 |
| GGB28916 SGB41612 | 0       | 0.06896 |
| GGB28927 SGB41625 | 0       | 0.0114  |
| GGB28934 SGB41635 | 0       | 0.0236  |
| GGB28949 SGB41655 | 0       | 0.06175 |
| GGB28958 SGB41667 | 0       | 0.00766 |
| GGB28959 SGB41668 | 0       | 0.02187 |
| GGB28961 SGB41670 | 0       | 0.00247 |
| GGB28967 SGB41417 | 0       | 0.0068  |
| GGB28967 SGB41678 | 0       | 0.01306 |
| GGB28980 SGB41692 | 0       | 0.07409 |
| GGB28981 SGB41693 | 0       | 0.02798 |
| GGB28981 SGB41694 | 0       | 0.00041 |
| GGB28991 SGB41705 | 0       | 0.01749 |
| GGB28996 SGB41712 | 0       | 0.50854 |
| GGB29001 SGB41717 | 0       | 0.14935 |
| GGB29002 SGB41718 | 0       | 0.19764 |
| GGB29003 SGB41719 | 0       | 0.10879 |
| GGB29004 SGB41721 | 0       | 0.56836 |
| GGB29005 SGB41723 | 0       | 1.3658  |
| GGB29008 SGB41728 | 0       | 1.04995 |
| GGB29468 SGB42247 | 0.24007 | 0.01044 |
| GGB29530 SGB42316 | 0       | 0.00513 |
| GGB29531 SGB42317 | 0       | 0.22355 |
| GGB29549 SGB42343 | 0       | 0.03529 |
| GGB30141 SGB43066 | 0       | 0.02761 |
| GGB30142 SGB43067 | 0       | 0.05018 |
| GGB30145 SGB43072 | 0       | 0.05791 |
| GGB30147 SGB43074 | 0       | 0.29976 |
| GGB30290 SGB43252 | 0       | 0.46782 |
| GGB30296 SGB43260 | 0       | 0.00408 |
| GGB30298 SGB43262 | 0       | 0.00201 |
| GGB30300 SGB43264 | 0       | 0.02247 |
| GGB30301 SGB43265 | 0       | 0.00209 |
| GGB30302 SGB43266 | 0       | 0.0349  |
| GGB30302 SGB43267 | 0       | 0.03564 |

|                    |         |         |
|--------------------|---------|---------|
| GGB30311 SGB43288  | 0       | 0.68854 |
| GGB30408 SGB43438  | 0       | 0.00432 |
| GGB30413 SGB43452  | 0       | 0.06032 |
| GGB30414 SGB43453  | 0       | 0.01651 |
| GGB30450 SGB43507  | 0       | 0.53368 |
| GGB30451 SGB43508  | 0       | 0.05525 |
| GGB30454 SGB43514  | 0       | 0.05656 |
| GGB30455 SGB43519  | 0       | 0.1692  |
| GGB30457 SGB63218  | 0       | 0.03071 |
| GGB30458 SGB41562  | 0       | 0.00241 |
| GGB30461 SGB43530  | 0       | 0.09318 |
| GGB30461 SGB43533  | 0       | 0.29894 |
| GGB30461 SGB63209  | 0       | 0.00315 |
| GGB30463 SGB102197 | 0       | 0.16181 |
| GGB30466 SGB43540  | 0       | 0.95528 |
| GGB30466 SGB43544  | 0       | 0.00785 |
| GGB30466 SGB63211  | 0       | 0.01321 |
| GGB30468 SGB43552  | 0       | 0.01362 |
| GGB30473 SGB43557  | 0       | 0.17993 |
| GGB30620 SGB43754  | 0       | 0.16402 |
| GGB30667 SGB43809  | 0       | 0.3167  |
| GGB31064 SGB44328  | 0       | 0.50223 |
| GGB31109 SGB44380  | 0       | 0.44928 |
| GGB31312 SGB44628  | 0       | 0.11499 |
| GGB31439 SGB44769  | 0       | 0.52772 |
| GGB31701 SGB45057  | 0       | 0.2236  |
| GGB3171 SGB4185    | 0       | 0.13278 |
| GGB31823 SGB45199  | 0       | 0.30646 |
| GGB31839 SGB45217  | 0.03345 | 1.40112 |
| GGB31850 SGB45228  | 0       | 0.61679 |
| GGB31851 SGB45230  | 0       | 0.21088 |
| GGB31853 SGB45233  | 0       | 0.10812 |
| GGB3583 SGB21441   | 0       | 2.13401 |
| GGB3661 SGB41629   | 0       | 0.13443 |
| GGB3793 SGB41498   | 0       | 0.17019 |
| GGB42328 SGB59496  | 0       | 0.04002 |
| GGB42343 SGB59511  | 0       | 0.13431 |
| GGB42344 SGB59512  | 0       | 0.09735 |
| GGB42586 SGB59781  | 0       | 0.02015 |
| GGB42949 SGB43520  | 0       | 0.03062 |
| GGB45293 SGB41002  | 0       | 0.39775 |

|                                              |         |         |
|----------------------------------------------|---------|---------|
| GGB45514 SGB63186                            | 0       | 0.01821 |
| GGB45536 SGB63216                            | 0       | 0.0775  |
| GGB45650 SGB63364                            | 0       | 0.0103  |
| GGB45977 SGB41021                            | 0       | 0.01222 |
| GGB47127 SGB65053                            | 0       | 0.0713  |
| GGB47180 SGB59839                            | 0       | 0.02132 |
| GGB47462 SGB65425                            | 0       | 0.02576 |
| GGB49462 SGB63227                            | 0       | 0.04215 |
| GGB5207 SGB43496                             | 0       | 0.04238 |
| GGB54153 SGB41631                            | 0       | 0.46928 |
| GGB70394 SGB94816                            | 0       | 0.07439 |
| GGB74395 SGB43523                            | 0       | 0.06343 |
| GGB74408 SGB43542                            | 0       | 0.07777 |
| GGB75036 SGB102224                           | 0       | 0.01305 |
| GGB75053 SGB43494                            | 0       | 0.11501 |
| GGB75055 SGB43513                            | 0       | 0.01265 |
| GGB75064 SGB102200                           | 0       | 0.04921 |
| GGB75064 SGB43546                            | 0       | 0.0259  |
| GGB75085 SGB102286                           | 0       | 0.00501 |
| GGB75106 SGB102240                           | 0       | 0.00683 |
| GGB75900 SGB102322                           | 0       | 0.03186 |
| GGB75975 SGB102453                           | 0       | 0.14421 |
| GGB79592 SGB45219                            | 0       | 0.14268 |
| GGB79731 SGB41725                            | 0       | 0.30973 |
| GGB79848 SGB41595                            | 0       | 0.05902 |
| GGB79857 SGB42426                            | 0       | 1.48303 |
| GGB79872 SGB36958                            | 0       | 0.33777 |
| GGB79926 SGB43248                            | 0       | 0.21505 |
| GGB79948 SGB41679                            | 0       | 0.02542 |
| GGB79989 SGB41645                            | 0       | 0.00182 |
| GGB80042 SGB43554                            | 0       | 0.86513 |
| GGB80101 SGB21440                            | 4.41276 | 1.56761 |
| GGB3583 SGB21441                             | 5.6962  | 0       |
| <i>Hungateiclostridiaceae bacterium KB18</i> | 0       | 0.03345 |
| <i>Lachnospiraceae bacterium</i>             | 0       | 0.03026 |
| <i>Lachnospiraceae bacterium MD308</i>       | 0       | 0.02835 |
| <i>Lachnospiraceae unclassified SGB41402</i> | 0       | 0.01033 |
| <i>Lachnospiraceae unclassified SGB41424</i> | 0       | 0.02219 |
| <i>Lactobacillus SGB5158</i>                 | 0       | 0.02068 |
| <i>Lactobacillus taiwanensis</i>             | 0.53578 | 0.01862 |
| <i>Lactococcus SGB40208</i>                  | 0       | 1.31695 |



|                                                 |            |            |
|-------------------------------------------------|------------|------------|
| <i>Leuconostoc</i> SGB43006                     | 0          | 0.07949    |
| <i>Ligilactobacillus murinus</i>                | 0.14169    | 0          |
| <i>Limosilactobacillus</i> SGB43493             | 0          | 0.05189    |
| <i>Limosilactobacillus reuteri</i>              | 0.14098    | 0          |
| <i>Methanomethylovoran</i> SGB40959157          | 0          | 0.22484    |
| <i>Muribaculaceae</i> bacterium                 | 3.66231    | 2.52312    |
| <i>Muribaculaceae</i> bacterium Isolate 013 NCI | 5.19565    | 1.82399    |
| <i>Muribaculaceae</i> bacterium Isolate 110 HZI | 0.58142    | 0.22733    |
| <i>Muribaculum intestinale</i>                  | 2.54524    | 0.95207    |
| <i>Odoribacter</i> spZ80                        | 0          | 1.08894    |
| <i>Oscillibacter</i> sp13                       | 0          | 0.01114    |
| <i>Oscillibacter</i> spCU971                    | 0          | 0.36961    |
| <i>Oscillospiraceae</i> bacterium               | 0          | 0.02386    |
| <i>Parabacteroides goldsteinii</i>              | 0          | 0.09265    |
| <i>Paramuribaculum intestinale</i>              | 0.86322    | 0.34668    |
| <i>Prevotella</i> spPCJ2                        | 0.13709    | 5.08024    |
| <i>Rikenellaceae</i> bacterium                  | 0          | 2.26775    |
| <i>Streptococcus</i> SGB45231                   | 0          | 0.03049    |
| <i>Turicimona muris</i>                         | 5.07825    | 1.03866    |
| <i>Zoogloeaceae</i> SGB41465                    | 0          | 0.00438    |
| <b>Total</b>                                    | <b>100</b> | <b>100</b> |

**Table S6.** Bacterial community structure in ileum and colon samples from SPF mice. Values displayed are relative abundance in "%" at the family level.

| <b>SPF bacterial families</b>                                 | <b>Ileum</b> | <b>Colon</b> |
|---------------------------------------------------------------|--------------|--------------|
| <i>Aerococcaceae</i>                                          | 0.051        | 2.23         |
| <i>Akkermansiaceae</i>                                        | 0.16         | 0.13         |
| <i>Atopobiaceae</i>                                           | 0.02         | 0.01         |
| <i>Bacteroidaceae</i>                                         | 0.05         | 4.16         |
| <i>Bacteroidetes phylum families</i>                          | 23.18        | 14.40        |
| <i>Barnesiellaceae</i>                                        | 3.29         | 0            |
| <i>Brevibacteriaceae</i>                                      | 0            | 0.03         |
| <i>Candidatus_Melainabacteria phylum classified families</i>  | 0            | 0.45         |
| <i>Candidatus_Saccharibacteria phylum classified families</i> | 0            | 0.09         |
| <i>Christensenellaceae</i>                                    | 0            | 0.17         |
| <i>Clostridiaceae</i>                                         | 0.69         | 0.77         |
| <i>Desulfovibrionaceae</i>                                    | 0.35         | 11.01        |
| <i>Eggerthellaceae</i>                                        | 0            | 0            |
| <i>Eubacteriales_Family_XIII_Incertae_Sedis</i>               | 0            | 0.01         |
| <i>Firmicutes phylum classified families</i>                  | 5.71         | 21           |
| <i>Lachnospiraceae</i>                                        | 1.40         | 1.97         |
| <i>Lactobacillaceae</i>                                       | 0.82         | 0.20         |
| <i>Muribaculaceae</i>                                         | 42.63        | 15.40        |
| <i>Odoribacteraceae</i>                                       | 0            | 1.09         |
| <i>Peptoniphilaceae</i>                                       | 0            | 0.03         |
| <i>Oscillospiraceae</i>                                       | 0            | 6.92         |
| <i>Prevotellaceae</i>                                         | 0.14         | 5.08         |

|                          |            |            |
|--------------------------|------------|------------|
| <i>Proteobacteria</i>    | 0          | 0.32       |
| <i>Rikenellaceae</i>     | 0.03       | 6.62       |
| <i>Ruminococcaceae</i>   | 0          | 0.01       |
| <i>Selenomonadaceae</i>  | 13.54      | 4.57       |
| <i>Staphylococcaceae</i> | 2.60       | 0.89       |
| <i>Streptococcaceae</i>  | 0          | 1.35       |
| <i>Sutterellaceae</i>    | 5.34       | 1          |
| <i>Tannerellaceae</i>    | 0          | 0.09       |
| <i>Zoogloeaceae</i>      | 0          | 0          |
| <b><i>Sum</i></b>        | <b>100</b> | <b>100</b> |

**Table S7:** Percentage of non-mouse reads assigned as prophage and bacteriophage designated fractions.

|            | Prophages | Bacteriophages |
|------------|-----------|----------------|
| SPF        | 0.63      | 4.24           |
| Oligo-MM12 | 0.45      | 2.84           |
| ASF        | 0.80      | 0.93           |

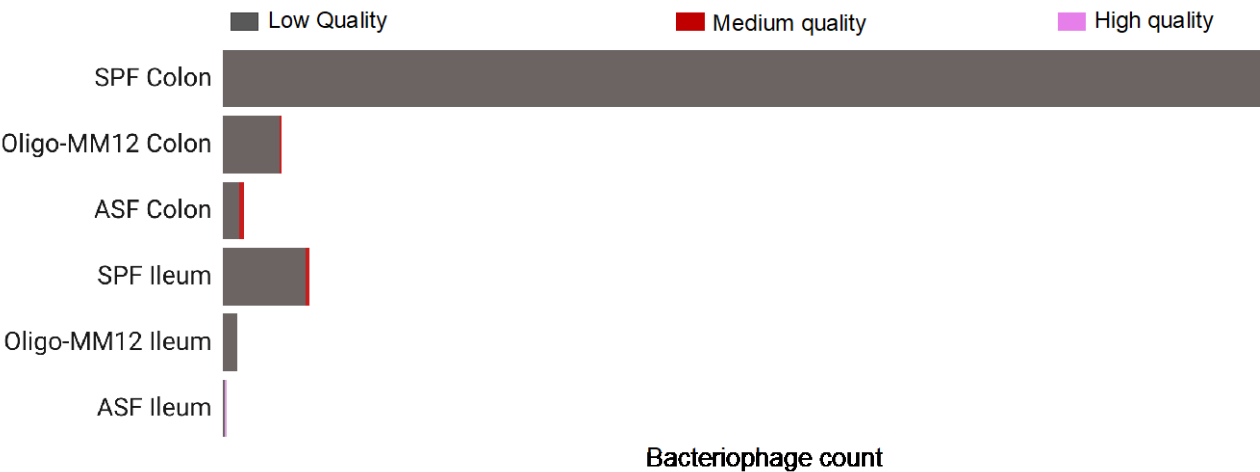

**Figure S3:** Bacteriophage-designated contigs count in Gnotobiotic Oligo-MM12 and ASF compared to wildtype SPF. Bacteriophage contigs quality was classified based on genome completeness. Red and grey colour bars denote medium and low quality, while pink denotes high quality.

**Table S8:** List of identified prophages (integrated virus) in SPF and gnotobiotic Oligo-MM12 and ASF mice using PHASTER web tool pipeline (<https://phaster.ca/>) with a default minimum contig length >2000 bp. Complete prophages designated as 100% intact are highlighted in red, > 70% are questionable prophages denoted in black, while prophages with a completeness score of < 70% denoted as green are considered incomplete prophages.

|                      | <b>Viral genome<br/>hallmark genes</b>               | <b>Length<br/>(kb)</b> | <b>Completeness<br/>score</b> | <b>NCBI Phage name</b>           | <b>GC%</b> |
|----------------------|------------------------------------------------------|------------------------|-------------------------------|----------------------------------|------------|
| <b>SPF<br/>Colon</b> | terminase, tail                                      | 50.1                   | Questionable<br>(70)          | <i>Lagaffevirus lagaffe</i>      | 53.95      |
|                      | lysine                                               | 14.8                   | Incomplete<br>(20)            | <i>Unahavirus uv1H</i>           | 50.51      |
|                      | tail                                                 | 8.7                    | Incomplete<br>(20)            | <i>Caudoviricetes<br/>virus</i>  | 36.69      |
|                      | Tail, Integrase                                      | 7.7                    | Incomplete<br>(40)            | <i>Lullwatervirus</i>            | 51.42      |
|                      | Tail, head, portal,<br>terminase                     | 20.3                   | Questionable<br>(80)          | <i>Vedamuthuvirus<br/>BM13</i>   | 45.14      |
|                      | tail,plate,capsid,port<br>al,terminase,integra<br>se | 20.1                   | Complete<br>(100)             | <i>Lilyvirus</i>                 | 38.97      |
|                      | Coat, head, tail                                     | 13.7                   | Questionable<br>(70)          | <i>Yongloolinvirus<br/>MMP01</i> | 42.86      |
|                      | Tail, capsid                                         | 53                     | Complete<br>(100)             | <i>Brigitvirus</i>               | 45.05      |
|                      | NA                                                   | 5.1                    | Incomplete<br>(10)            | <i>Harrisonvirus</i>             | 38.69      |
|                      | Tail, capsid, portal,<br>protease, terminase         | 16.2                   | Complete<br>(100)             | Trabyvirinae                     | 48.53      |
|                      | Portal,tail                                          | 15.4                   | Incomplete<br>(50)            | <i>Secretariatvirus</i>          | 51.40      |
|                      | plate                                                | 15.1                   | Incomplete<br>(20)            | <i>Bixzunavirus</i>              | 49.08      |

|                         |                                         |      |                   |                               |       |
|-------------------------|-----------------------------------------|------|-------------------|-------------------------------|-------|
|                         | Lysin, tail, terminase                  | 11.1 | Incomplete (50)   | <i>Vashvirus lilbooboo</i>    | 62.41 |
|                         | Capsid, terminase, head                 | 22   | Incomplete (40)   | <i>Pippivirus lotta</i>       | 55.19 |
|                         | Tail, head, recombinase, terminase      | 12.5 | Incomplete (60)   | <i>Caudoviricetes virus</i>   | 47.85 |
|                         | Capsid, portal, terminase               | 11.2 | Incomplete (40)   | <i>Leicestervirus CD382</i>   | 45.87 |
|                         | NA                                      | 11.4 | Incomplete (10)   | <i>Arawnvirus arawn</i>       | 29.31 |
|                         | tail                                    | 5    | Incomplete (20)   | <i>Rimavirus rima.</i>        | 43.47 |
|                         | Capsid, portal, terminase               | 14.7 | Incomplete (40)   | <i>Sherbrookevirus CDHM14</i> | 49.01 |
|                         | Tail                                    | 8.9  | Incomplete (20)   | <i>Oengusvirus oengus</i>     | 49.34 |
|                         | Terminase, head                         | 16.3 | Incomplete (30)   | <i>Pippivirus pippi</i>       | 56.22 |
|                         | terminase, portal, protease, head, tail | 16   | Questionable (70) | <i>Cequinguevirus Ld17</i>    | 41.21 |
|                         | portal, terminase, tail                 | 15.4 | Incomplete (60)   | <i>Caudoviricetes virus</i>   | 45.22 |
|                         | Lysin                                   | 15.5 | Incomplete (20)   | <i>Mushuvirus mushu</i>       | 63.07 |
|                         | head, tail, portal, capsid, plate       | 26.4 | Complete (100)    | <i>Kamchatkavirus AP45</i>    | 57.77 |
| <b>Oligo-MM12 Colon</b> | tail                                    | 9.6  | Incomplete (30)   | <i>Caudoviricetes virus</i>   | 48.8  |
|                         | Lysin                                   | 9.3  | Incomplete (20)   | <i>Mushuvirus mushu</i>       | 57.51 |

|                                  |                                                         |      |                    |                                  |       |
|----------------------------------|---------------------------------------------------------|------|--------------------|----------------------------------|-------|
| <b>ASF<br/>Colon</b>             | NA                                                      | 17.6 | Incomplete<br>(10) | <i>Caudoviricetes<br/>virus</i>  | 31.29 |
|                                  | NA                                                      | 16.3 | Incomplete<br>(10) | <i>Caudoviricetes<br/>virus</i>  | 31.62 |
|                                  | head,plate                                              | 12.4 | Incomplete<br>(30) | <i>Colneyvirus CD505</i>         | 23.04 |
|                                  | capsid,tail,head,portal,terminase,reverse transcriptase | 25.6 | Complete<br>(100)  | <i>Sherbrookevirus<br/>CD506</i> | 29.62 |
|                                  | head,portal,terminase,tail                              | 12.5 | Incomplete<br>(60) | <i>Caudoviricetes<br/>virus</i>  | 39.49 |
| <b>SPF<br/>Ileum</b>             | lysine                                                  | 14.8 | Incomplete<br>(20) | <i>Labanvirus</i>                | 50.52 |
|                                  | Tail                                                    | 21.7 | Incomplete<br>(20) | <i>Muminivirus filifjonk</i>     | 42.17 |
|                                  | Reverse transcriptase                                   | 16   | Incomplete<br>(20) | <i>Baltivirus</i>                | 50.14 |
|                                  | head,terminase, capsid                                  | 22   | Incomplete<br>(40) | <i>Pippivirus pippi</i>          | 55.19 |
| <b>Oligo-<br/>MM12<br/>Ileum</b> | Integrase, tail                                         | 36.4 | Incomplete<br>(50) | <i>Caudoviricetes<br/>virus</i>  | 40.37 |
|                                  | capsid                                                  | 11.7 | Incomplete<br>(20) | <i>Caudoviricetes<br/>virus</i>  | 52.54 |
| <b>ASF<br/>Ileum</b>             | tail,terminase,portal,head,capsid,lysine                | 36.2 | Complete<br>(100)  | <i>Caudoviricetes<br/>LfeSau</i> | 38.98 |
|                                  | lysine,tail,capsid                                      | 18.8 | Incomplete<br>(40) | <i>Caudoviricetes<br/>virus</i>  | 41.37 |

|  |                                      |      |                      |                                       |       |
|--|--------------------------------------|------|----------------------|---------------------------------------|-------|
|  | tail,integrase                       | 5.7  | Incomplete<br>(30)   | <i>Caudoviricetes</i><br><i>virus</i> | 37.11 |
|  | terminase,capsid                     | 10.2 | Incomplete<br>(30)   | <i>Caudoviricetes</i><br><i>virus</i> | 40.73 |
|  | integrase,terminase,<br>portal, head | 24.7 | Questionable<br>(70) | <i>Caudoviricetes</i><br><i>virus</i> | 39.54 |



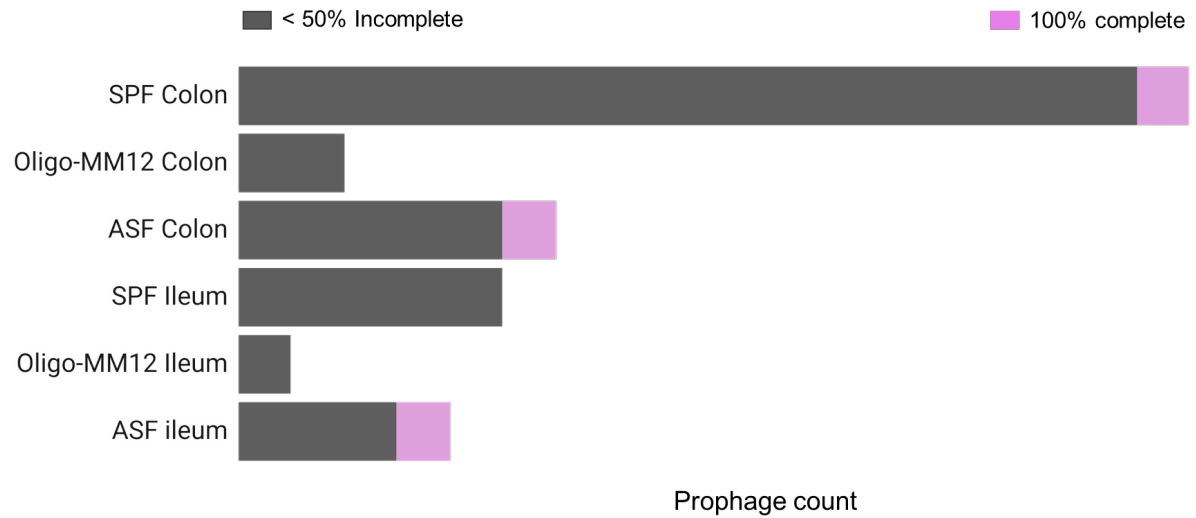

**Figure S4:** Distribution of prophage contigs according to count and completeness in the colon and ileum of SPF, gnotobiotic Oligo-MM12 and ASF. The identified prophages were classified as complete (100%) and incomplete (< 50%) Grey represents incomplete prophages while pink denotes complete prophages.

**Table S9:** List of identified prophages (integrated virus) in gnotobiotic Oligo-MM12 and ASF microflora available individual strain sequences (downloaded from NCBI), using PHASTER web tool pipeline (<https://phaster.ca/>) with a default minimum contig length >2000 bp. Complete prophages designated as 100% intact are highlighted in red, > 70% are questionable prophages denoted in black, while prophages with a completeness score of < 70% denoted as green are considered incomplete prophages (1,2).

| Oligo-MM12                     |                         |                                               |          |                    |                       |       |
|--------------------------------|-------------------------|-----------------------------------------------|----------|--------------------|-----------------------|-------|
| Bacteria sequences from NCBI   | Family Classification   | Viral genome key words                        | size(kb) | completeness score | NCBI phage name       | GC%   |
| <i>Clostridium innocuum</i>    | <i>Lachnospraceae</i>   | Integrase, tail, terminase, capsid            | 40.6     | questionable (90)  | Caudoviricetes phage  | 41.24 |
|                                |                         | tail, lysin, transposase                      | 50.2     | incomplete(60)     | Caudoviricetes phage  | 24.78 |
|                                |                         | Integrase, head, terminase, capsid            | 79.5     | questionable (80)  | Caudoviricetes phage  |       |
|                                |                         |                                               |          |                    |                       |       |
| <i>Enterococcus faecalis</i>   | <i>Enterococcaceae</i>  | tail, capsid                                  | 14.6     | incomplete(40)     | Caudoviricetes phage  | 38.73 |
|                                |                         | Integrase                                     | 29.9     | incomplete(20)     | Punavirus RCS47       | 34.91 |
|                                |                         |                                               |          |                    |                       |       |
| <i>Muribaculum intestinale</i> | <i>Muribaculaceae</i>   | transposase,head                              | 32.4     | incomplete(60)     | Gamaleyavirus Bp4     | 44.87 |
|                                |                         | Integrase,transposase                         | 31.4     | intact(100)        | Peduvovirus           | 46.12 |
|                                |                         |                                               |          |                    |                       |       |
| <i>Akkermansia muciniphila</i> | <i>Akkermansiaceae</i>  | Integrase                                     | 34.9     | incomplete(30)     | Hollowayvirus F116    | 55.08 |
|                                |                         | none                                          | 10.4     | incomplete(10)     | Caudoviricetes phage  | 51.82 |
| <i>Blautia coccoides</i>       | <i>Lachnospraceae</i>   | tail, transposase, recombinase, portal, lysis | 44.5     | intact(140)        | Caudoviricetes phage  | 45.55 |
|                                |                         | Integrase, terminase, capsid, coat            | 46       | questionable (90)  | Leicestervirus CD111. | 42.34 |
|                                |                         | tail, fiber                                   | 11.4     | incomplete(30)     | Caudoviricetes phage  | 42.5  |
|                                |                         |                                               |          |                    |                       |       |
| <i>Acutalibacter muris</i>     | <i>Oscillospiraceae</i> | Integrase, tail, recombinase, transposase     | 38       | questionable (80)  | Donellivirus          | 54.1  |
|                                |                         | Integrase,transposase,plate                   | 18.6     | incomplete(60)     | Friunavirus           | 49.44 |
|                                |                         | coat, lysis                                   | 14.9     | incomplete(30)     | Caudoviricetes phage  | 59.19 |
|                                |                         | tail, transposase                             | 21.1     | questionable (90)  | Leicestervirus CD111. | 57.6  |

|                                                 |                           |                                                    |      |                   |                                        |        |
|-------------------------------------------------|---------------------------|----------------------------------------------------|------|-------------------|----------------------------------------|--------|
|                                                 |                           |                                                    |      |                   |                                        |        |
| <i>Bacteroides caecimuris</i>                   | <i>Bacteroidaceae</i>     | integrase,tail                                     | 9.9  | incomplete(60)    | Caudoviricetes phage                   | 46.78  |
|                                                 |                           | tail, transposase                                  | 9.5  | incomplete(30)    | Leicestervirus                         | 42.14  |
| <i>Lactobacillus reuteri</i>                    | <i>Lactobacillaceae</i>   | integrase,transposase                              | 34.8 | questionable (70) | Lafunavirus                            | 36.41  |
| <i>Flavonifractor plautii</i>                   | <i>Oscillospiraceae</i>   | recombinase,head                                   | 24.6 | incomplete(30)    | Caudoviricetes phage                   | 50.12  |
|                                                 |                           | portal,capsid                                      | 16.3 | incomplete(30)    | Caudoviricetes phage                   | 51.05  |
|                                                 |                           | integrase                                          | 16.5 | incomplete(20)    | Caudoviricetes phage                   | 49.28  |
|                                                 |                           | tail,plate,terminase,portal,head                   | 34.2 | intact(100)       | Caudoviricetes phage                   | 60.17  |
| <i>Bifidobacterium animalis subsp. animalis</i> | <i>Bifidobacteriaceae</i> | None                                               |      |                   |                                        |        |
|                                                 |                           |                                                    |      |                   |                                        |        |
| <i>Turicimonas muris</i>                        | <i>Sutterellaceae</i>     | unknown                                            | 14.5 | incomplete(10)    | Caudoviricetes phage                   | 40.5   |
|                                                 |                           | tail,integrase                                     | 39.1 | incomplete(50)    | Caudoviricetes phage                   | 40.57  |
|                                                 |                           | head,terminase                                     | 8.8  | incomplete(30)    | Caudoviricetes phage                   | 44.69  |
|                                                 |                           |                                                    |      |                   |                                        |        |
| <i>Clostridium clostridioforme</i>              | <i>Lachnospiraceae</i>    | integrase                                          | 26.7 | incomplete(30)    | Caudoviricetes phage                   | 43.42  |
|                                                 |                           | integrase, tail                                    | 26.9 | incomplete(30)    | Caudoviricetes phage                   | 46.25  |
|                                                 |                           | lysine,tail,plate,capsid,protease,portal,terminase | 49.9 | intact(150)       | caudoviricetes phage;<br>Toutatisvirus | 48.09  |
|                                                 |                           | transposase                                        | 12.8 | incomplete(50)    | Caudoviricetes phage                   | 45.6   |
|                                                 |                           | transposase,integrase                              | 29.4 | incomplete(40)    | Caudoviricetes; Magadivir              | 47.34% |
|                                                 |                           | integrase,transposase,tail                         | 8.7  | incomplete(50)    | Caudoviricetes; Peduovirus             | 43.28% |
|                                                 |                           | recombinase,transposase                            | 31   | questionable(70)  | Caudoviricetes Oenococcus<br>phage     | 46.03% |
|                                                 |                           | transposase,tail                                   | 12.9 | incomplete(60)    | Caudoviricetes phage                   | 44.36% |
|                                                 |                           | recombinase,transposase                            | 24.3 | incomplete(40)    | Caudoviricetes phage                   | 48.36% |
|                                                 |                           | lysine,transposase,integrase                       | 37.2 | questionable(70)  | Caudoviricetes phage                   | 42.76% |
|                                                 |                           | tail,head,capsid,portal,terminase,lysine,integrase | 42.7 | intact(150)       | Caudoviricetes phage                   | 47.63% |
|                                                 |                           | lysine                                             | 44.2 | questionable(77)  | Caudoviricetes; Mushuvirus             | 51.91% |
|                                                 |                           | transposase,tail                                   | 17.5 | incomplete(40)    | unclassified                           | 44.27% |
|                                                 |                           | transposase,tail,integrase                         | 38.3 | questionable(80)  | Caudoviricetes phage                   | 43.60% |

|  |  |                         |      |                |                                          |        |
|--|--|-------------------------|------|----------------|------------------------------------------|--------|
|  |  | none                    | 33.6 | incomplete(20) | <i>Caudoviricetes; Autographiviridae</i> | 45.02% |
|  |  | none                    | 15.5 | incomplete(10) | <i>Caudoviricetes; Kyanoviridae</i>      | 48.10% |
|  |  | none                    | 25.3 | incomplete(10) | <i>Caudoviricetes; Guelinviridae</i>     | 50.74% |
|  |  | tail                    | 9.9  | incomplete(20) | <i>Caudoviricetes phage</i>              | 45.83  |
|  |  | transposase             | 7    | incomplete(40) | <i>Caudoviricetes; Yongloolinvirus</i>   | 42.78  |
|  |  | integrase               | 15.7 | incomplete(20) | <i>Caudoviricetes phage</i>              | 50.28  |
|  |  | integrase,transposase   | 43.7 | intact(100)    | <i>Caudoviricetes phage</i>              | 49.21  |
|  |  | none                    | 8    | incomplete(10) | <i>Caudoviricetes phage</i>              | 48.33  |
|  |  | tail,capsid,head,portal | 44.2 | intact(110)    | <i>Caudoviricetes; Yongloolinvirus</i>   | 49.26  |
|  |  | lysin                   | 45.6 | incomplete(30) | <i>Caudoviricetes phage</i>              | 49.19  |
|  |  |                         |      |                |                                          |        |

| ASF                                   |                         |                                                         |           |                    |                               |       |
|---------------------------------------|-------------------------|---------------------------------------------------------|-----------|--------------------|-------------------------------|-------|
| Bacteria sequences from NCBI          | Family taxa             | Viral genome key words                                  | Size (kb) | completeness score | NCBI phage name               | GC%   |
| <i>Clostridium spp ASF</i>            | <i>Clostridiaceae</i>   | tail                                                    | 20.6      | incomplete(30)     | <i>Abouovirus</i>             | 28.33 |
|                                       |                         | tail, terminase, capsid, portal, head, plate            | 22.9      | intact(110)        | <i>Yongloolinivirus MMP03</i> | 30.14 |
|                                       |                         | Integrase                                               | 30.2      | incomplete(40)     | <i>Caudoviricetes phage</i>   | 31.18 |
|                                       |                         | tail                                                    | 17.1      | incomplete(50)     | <i>Caudoviricetes phage</i>   | 32.16 |
|                                       |                         | integrase,recombinase,terminase,portal,head,tail,capsid | 41.1      | intact(150)        | <i>Sherbrookevirus</i>        | 29.55 |
|                                       |                         | integrase,tail                                          | 9.2       | incomplete(30)     | <i>Phietavirus</i>            | 30.34 |
|                                       |                         | tail, capsid                                            | 32.1      | questionable(70)   | <i>Yongloolinivirus</i>       | 35.38 |
|                                       |                         | none                                                    | 6.1       | incomplete(10)     | <i>Saundersvirus</i>          | 27.72 |
|                                       |                         | integrase                                               | 19.6      | incomplete(40)     | <i>Colneyvirus CD505</i>      | 29.09 |
|                                       |                         | integrase,head,tail,plate                               | 46.5      | intact(100)        | <i>Brigitvirus</i>            | 36.26 |
|                                       |                         | none                                                    | 12.9      | incomplete(10)     | <i>Caudoviricetes phage</i>   | 30.75 |
|                                       |                         | portal,recombinase,integrase,tail                       | 26.9      | questionable(70)   | <i>Caudoviricetes phage</i>   | 35.14 |
|                                       |                         | portal,recombinase,tail,integrase                       | 16.2      | incomplete(50)     | <i>Colneyvirus CD505</i>      | 29.71 |
|                                       |                         |                                                         |           |                    |                               |       |
| <i>Lactobacillus murinus ASF</i>      | <i>Lactobacillaceae</i> | transposase,terminase,portal,tail,capsid,plate,lysin    | 52        | intact(150)        | <i>Anamdongvirus</i>          | 39.89 |
|                                       |                         | Integrase,transposase,tail                              | 17.3      | incomplete(60)     | <i>Caudoviricetes phage</i>   | 38.00 |
|                                       |                         | tail, transposase                                       | 16        | incomplete(40)     | <i>Fernvirus</i>              | 39.94 |
|                                       |                         | capsid, transposase                                     | 6.8       | questionable(70)   | <i>Fernvirus</i>              | 37.22 |
|                                       |                         |                                                         |           |                    |                               |       |
| <i>Parabacterioidetes goldsteinii</i> | <i>Tannerellaceae</i>   | integrase                                               | 8.7       | incomplete(40)     | <i>Oshimavirus</i>            | 42.82 |
|                                       |                         | head,portal,terminase,tail                              | 12.5      | incomplete(60)     | <i>Caudoviricetes phage</i>   | 39.49 |

**Table S10: Similarity percentage (%) of Oligo-MM12 and ASF prophages (integrated virus) to genomes of single bacterial strains used for Oligo-MM12 and ASF to predict their host bacteria using blastn.**

|                         | Prophage-designated contig name                       | Bacteria strains of Gnotobiotic Oligo-MM12 and ASF | Family Taxonomic level  | Similarity (%) |
|-------------------------|-------------------------------------------------------|----------------------------------------------------|-------------------------|----------------|
| <b>Oligo-MM12 Colon</b> | k141_881,flag=1,multi=6.0000,len=10493:671-10493      | <i>Clostridium innocuum</i>                        | <i>Lachnospiraceae</i>  | 100            |
|                         | k141_2564,flag=1,multi=29.0000,len=11644:381-11419    | <i>Clostridium clostridioforme</i>                 | <i>Lachnospiraceae</i>  | 100            |
| <b>Oligo-MM12 Ileum</b> | k141_28455,flag=1,multi=49.9999,len=31210:17020-28738 | <i>Akkermansia muciniphila</i>                     | <i>Akkermansiaceae</i>  | 92.20          |
|                         | k141_24561,flag=1,multi=15.0020,len=55382:14360-50825 | Unclassified                                       |                         |                |
| <b>ASF Colon</b>        | k141_2793,flag=1,multi=61.4261,len=20498:1547-19217   | <i>Clostridium sp.</i>                             | <i>Clostridiaceae</i>   | 83.81          |
|                         | k141_4731,flag=1,multi=34.0000,len=42346:6795-23099   | <i>Clostridium sp.</i>                             | <i>Clostridiaceae</i>   | 84.04          |
|                         | k141_4731,flag=1,multi=34.0000,len=42346:29024-41515  | <i>Clostridium sp.</i>                             | <i>Clostridiaceae</i>   | 84.04          |
|                         | k141_6678,flag=1,multi=35.0119,len=28816:1397-27046   | <i>Clostridium sp.</i>                             | <i>Clostridiaceae</i>   | 81.91          |
|                         | k141_7003,flag=0,multi=416.0951,len=67939:2322-14050  | Unclassified                                       |                         |                |
| <b>ASF Ileum</b>        | k141_2644,flag=1,multi=28.0000,len=44442:4689-40895   | <i>Lactobacillus murinus</i>                       | <i>Lactobacillaceae</i> | 81.90          |
|                         | k141_4358,flag=1,multi=27.0000,len=19627:672-19491    | <i>Lactobacillus murinus</i>                       | <i>Lactobacillaceae</i> | 80             |
|                         | k141_4631,flag=1,multi=15.0000,len=15958:8963-14675   | <i>Lactobacillus murinus</i>                       | <i>Lactobacillaceae</i> | 100            |
|                         | k141_5131,flag=1,multi=26.0720,len=16007:150-10380    | <i>Lactobacillus murinus</i>                       | <i>Lactobacillaceae</i> | 100            |
|                         | k141_6867,flag=1,multi=27.0000,len=24904:167-24904    | <i>Lactobacillus murinus</i>                       | <i>Lactobacillaceae</i> | 81.34          |

a)

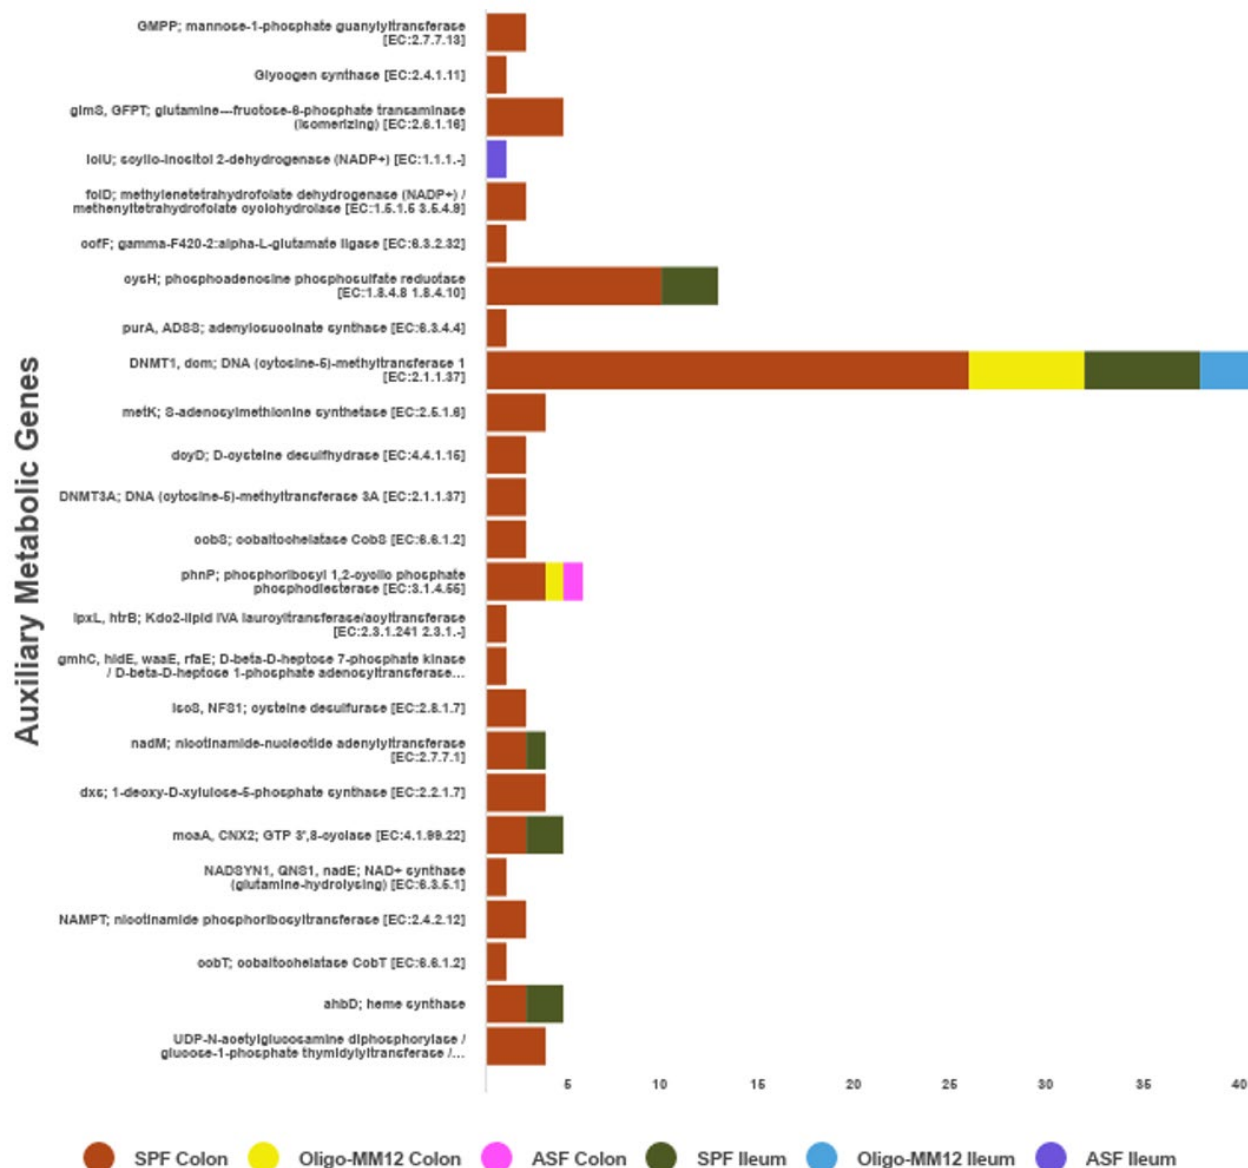

**Figure S5:** Bacteriophages associated auxiliary metabolic genes copy count in Gnotobiotic Oligo-MM12 and ASF compared to SPF.
